# Supplementary material
Source: PubMed Central journal article supplement (PMC5025037)
Supplement: NIHMS815618-supplement-Table_S1.pdf [file NIHMS815618-supplement-Table_S1.pdf]

**Supporting Information Table S1.** List of primers used in this study.

| Gene                      | Forward Primer             | Reverse Primer               |
|---------------------------|----------------------------|------------------------------|
| <b>For PCR</b>            |                            |                              |
| <i>neo</i>                | ATGATGGATACTTTCTCGGCAGGA   | TGCCACGTTGTGAGTTGGATAGTT     |
| <i>tk</i>                 | AATCCAGGATAAAAGACGTGCATGG  | GACAATCGCGAACATCTACACCAC     |
| <i>C-Myc-SOX2</i>         | GAAGTTCTCCTCCTCGTCGCAGTA   | CCTGCAGTACAACCTCCATGACCAG    |
| <i>SOX2-KLF4</i>          | TTCTCCGTCTCCGACAAAAGTTTC   | AAGAGTTCCCATCTCAAGGCACAC     |
| <i>KLF4-OCT4</i>          | GATCGTTGAACTCCTCGGTCTCTC   | ATGTGGTCCGAGTGTGGTTCTGTA     |
| <i>OriP</i>               | ATGGCTATGGGCAACACATAATCC   | CTCTCAGCGACCTCGTGAATATGA     |
| <i>EBNA-1</i>             | CCTCATCTCCATCACCTCCTTCAT   | TCCAACCCGAAATTTGAGAACATT     |
| <i>AMPpUC</i>             | TCCCGGCAACAATTAATAGACTGG   | TGAAGCCAGTTACCTTCGGAAAAA     |
| <i>NANOG-LIN28</i>        | AACCCTTCCATGTGCAGCTTACTC   | CTGCTGGGGAAGGCCTTAATGTA      |
| <i>miR302/367 cluster</i> | ACTTATTTCTCTCCTTCACCCCGATG | GGAAATCATGATCATCCCTTCTCCT    |
| <i>OCT4</i>               | CAGGCTCTGAGGTGTGG          | GACTCCTGCTTCGCCCTCA          |
| <i>NR5A2</i>              | TGTCAATTTGGCAGTTCTGGTTTT   | AGGGGTTTTATGCGATGGAGTTTC     |
| <i>GAPDH</i>              | GCAATGCCTCCTGTACCACC       | CCTGGAAGATGGTGTATGG          |
| <b>For RT-qPCR</b>        |                            |                              |
| <i>hOCT4</i>              | ATGGGAGCCCTCACTTCACT       | CCGCCAACTTGAGAAGGTC          |
| <i>hSOX2</i>              | CCCCCAGCAGACTTCACAT        | GCCAGCGAGTTCAACAAAG          |
| <i>hKLF4</i>              | GACCAGGCACTACCGTAAACA      | GGGTTCTCCTCCACGTCG           |
| <i>hC-MYC</i>             | GCTGGCGATGTTGAAAGTAAC      | TGCTGCTGCTGGTAGAAGTTC        |
| <i>hNANOG</i>             | TTCTCCTGCCAGTGACTTGG       | CCGCCAACTTGAGAAGGTC          |
| <i>hLIN28</i>             | GTGGCGTGAAACAGACTTTGA      | CGCACGTTGAACCACTTACA         |
| <i>pOCT4</i>              | CAAAGTGAAGGTGCCTGCCCTTC    | ATTGAACTTCACCTTCCCTCCAACC    |
| <i>pSOX2</i>              | GTTCCATGGGCTCAGTGGTCAAG    | AAGCGTACCGGGTTTTTCTCCATAC    |
| <i>pKLF4</i>              | CCCTTCAACCTGGCAGACAT       | CACAAACTTGCCCATCAGCC         |
| <i>pC-MYC</i>             | ATCCAAGACCACCACCACTG       | GTTACAGCAACATTCAGGTAGA       |
| <i>pNANOG</i>             | AGCCCCAGCTCCAGTTTCAGC      | AATGATCGTCACATATCTTCAGGCTGTA |
| <i>pLIN28</i>             | TGCCGGCATCTGTAAATGGT       | ACTCTGGTGACAAAAGACGT         |



|                              |   |   |   |   |   |   |   |   |   |   |   |
|------------------------------|---|---|---|---|---|---|---|---|---|---|---|
| pM3-5-5                      | Y | N |   |   |   |   |   |   |   |   |   |
| pM3-6-1                      | N | N | Y | Y | Y | N | Y | Y | N | Y | N |
| pM3-6-2                      | Y | Y |   |   |   |   |   |   |   |   |   |
| pM3-6-3                      | Y | Y |   |   |   |   |   |   |   |   |   |
| pM3-6-4                      | N | N | Y | Y | Y | N | Y | N | N | Y | N |
| pM3-6-5                      | N | Y |   |   |   |   |   |   |   |   |   |
| <b>Clones from pMaster12</b> |   |   |   |   |   |   |   |   |   |   |   |
| pM12-1-1                     | N | N | Y | N | Y | N | N | N | N | Y | N |
| pM12-1-2                     | N | Y |   |   |   |   |   |   |   |   |   |
| pM12-1-3                     | Y | N |   |   |   |   |   |   |   |   |   |
| pM12-1-4                     | Y | N |   |   |   |   |   |   |   |   |   |
| pM12-1-5                     | N | N | Y | Y | Y | N | N | N | N | Y | N |
| pM12-1-6                     | Y | Y |   |   |   |   |   |   |   |   |   |
| pM12-1-7                     | N | Y |   |   |   |   |   |   |   |   |   |
| pM12-2-1                     | N | N | Y | Y | Y | N | N | N | N | Y | N |
| pM12-2-2                     | N | Y |   |   |   |   |   |   |   |   |   |
| pM12-2-3                     | N | N | N | Y | Y | N | N | N | N | Y | N |
| pM12-2-4                     | N | N | N | Y | Y | N | N | N | N | Y | N |
| pM12-2-5                     | N | N | Y | Y | Y | N | N | N | N | Y | N |
| pM12-3-1                     | N | Y |   |   |   |   |   |   |   |   |   |
| pM12-3-2                     | N | Y |   |   |   |   |   |   |   |   |   |
| pM12-3-3                     | N | N | Y | N | Y | N | N | N | N | Y | N |
| pM12-3-4                     | N | N | Y | N | Y | N | N | N | N | Y | N |
| pM12-3-5                     | N | N | Y | Y | Y | N | N | N | N | Y | N |
| pM12-3-6                     | N | N | N | Y | Y | N | N | N | N | Y | N |
| pM12-3-7                     | N | Y |   |   |   |   |   |   |   |   |   |
| pM12-3-8                     | Y | N |   |   |   |   |   |   |   |   |   |
| pM12-3-9                     | N | Y |   |   |   |   |   |   |   |   |   |
| pM12-3-10                    | N | Y |   |   |   |   |   |   |   |   |   |
| pM12-4-1                     | N | N | Y | Y | Y | N | N | N | N | Y | N |
| pM12-4-2                     | N | N | Y | Y | Y | N | N | N | N | Y | N |
| pM12-4-3                     | Y | Y |   |   |   |   |   |   |   |   |   |
| pM12-4-4                     | N | N | Y | Y | Y | N | N | N | N | Y | N |
| pM12-4-5                     | N | N | Y | Y | Y | N | N | N | N | Y | N |
| pM12-4-6                     | N | Y |   |   |   |   |   |   |   |   |   |
| pM12-5-1                     | N | N | Y | Y | Y | N | N | N | N | Y | N |
| pM12-5-2                     | N | N | Y | Y | Y | N | N | N | N | Y | N |
| pM12-5-3                     | Y | N |   |   |   |   |   |   |   |   |   |
| pM12-5-4                     | Y | Y |   |   |   |   |   |   |   |   |   |
| pM12-5-5                     | N | N | Y | Y | Y | N | N | N | N | Y | N |
| pM12-5-6                     | N | N | Y | Y | Y | N | N | N | N | Y | N |
| pM12-5-7                     | N | Y |   |   |   |   |   |   |   |   |   |
| pM12-6-1                     | N | N | Y | Y | Y | N | N | N | N | Y | N |
| pM12-6-2                     | N | N | N | Y | Y | N | N | N | N | Y | N |

|           |   |   |   |   |   |   |   |   |   |   |   |
|-----------|---|---|---|---|---|---|---|---|---|---|---|
| pM12-6-3  | N | N | N | Y | Y | N | N | N | N | Y | N |
| pM12-6-4  | N | N | Y | N | Y | N | N | N | N | Y | N |
| pM12-6-5  | N | N | Y | Y | Y | N | N | N | N | Y | N |
| pM12-6-6  | N | N | Y | Y | Y | N | N | N | N | Y | N |
| pM12-6-7  | N | N | Y | Y | Y | N | N | N | N | Y | N |
| pM12-6-8  | N | N | Y | N | Y | N | N | N | N | Y | N |
| pM12-6-9  | N | N | Y | Y | Y | N | N | N | N | Y | N |
| pM12-6-10 | N | N | N | Y | Y | N | N | N | N | Y | N |
| pM12-6-11 | N | N | Y | Y | Y | N | N | N | N | Y | N |
| pM12-7-1  | Y | Y |   |   |   |   |   |   |   |   |   |
| pM12-7-2  | Y | Y |   |   |   |   |   |   |   |   |   |
| pM12-7-3  | Y | Y |   |   |   |   |   |   |   |   |   |
| pM12-7-4  | Y | Y |   |   |   |   |   |   |   |   |   |
| pM12-7-5  | Y | Y |   |   |   |   |   |   |   |   |   |
| pM12-8-1  | N | N | Y | Y | Y | N | N | N | N | Y | N |
| pM12-8-2  | N | N | Y | Y | Y | N | N | N | N | Y | N |
| pM12-8-3  | N | N | Y | Y | Y | N | N | N | N | Y | N |
| pM12-8-4  | N | N | Y | Y | Y | N | N | N | N | Y | N |
| pM12-8-5  | N | N | Y | Y | Y | N | N | N | N | Y | N |

Y, transgene intact; N, transgene removed.

Note: Even after FIAU selection, some clones still contained the *HSVtk* gene. This is likely due to gene silencing, or partial loss of the *HSVtk* gene expression component. The persistence of negative selection marker genes including *HSVtk* and *DTA* is also commonly observed in gene targeting experiments in ES cells.
