# Supplementary material
Source: PubMed Central journal article supplement (PMC5025037)

Figure S1

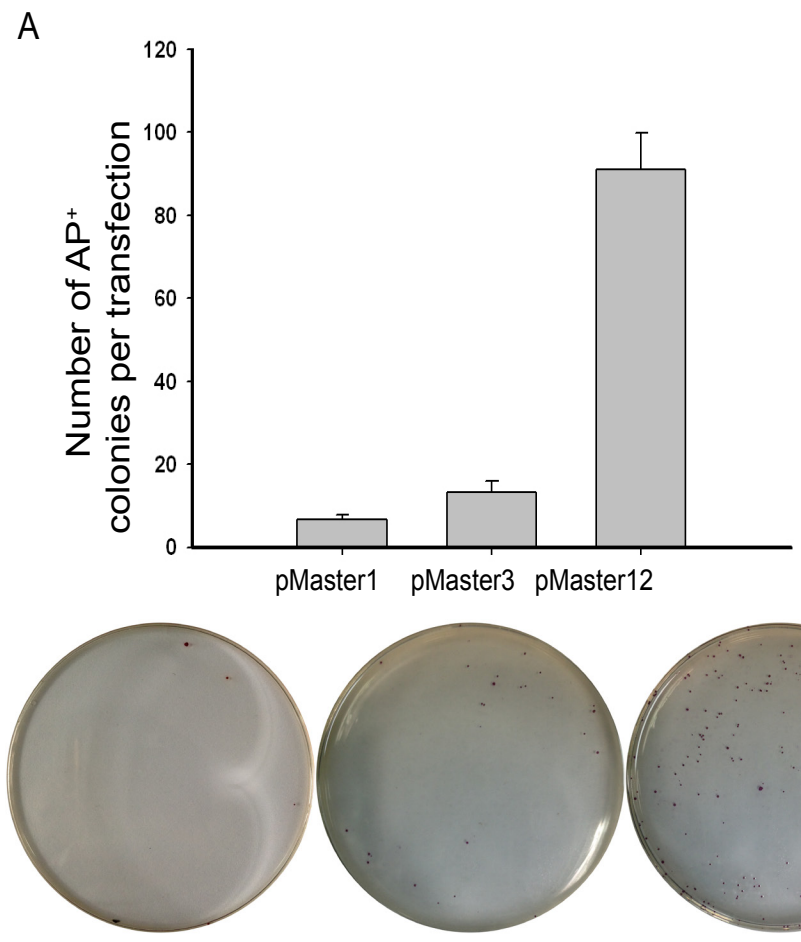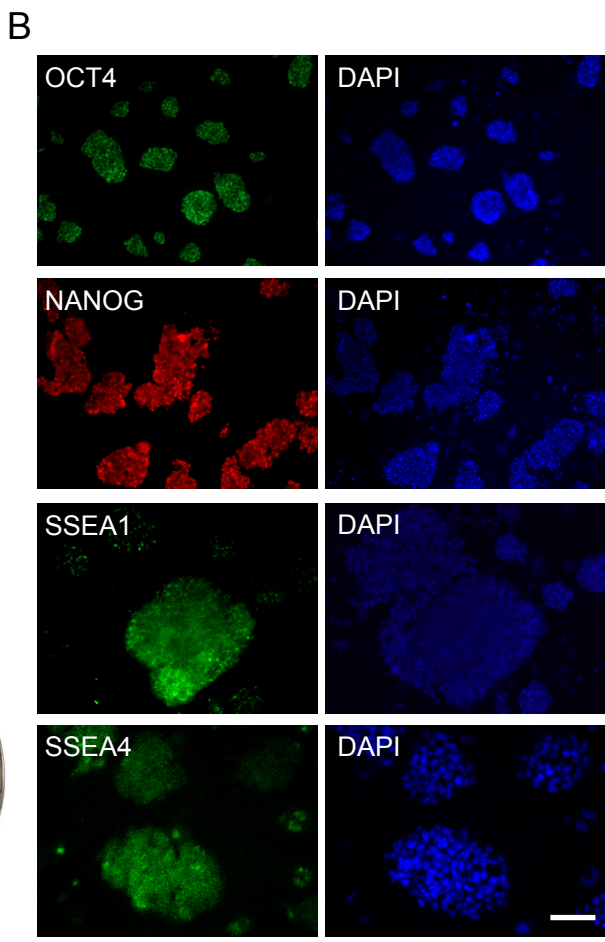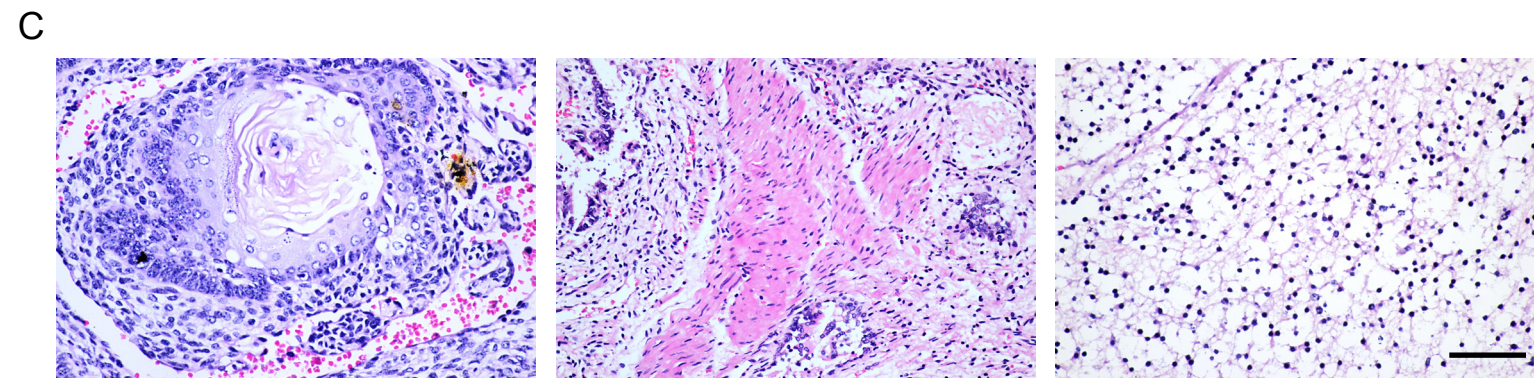

Supplement: NIHMS815618-supplement-Figure_S1.pdf [file NIHMS815618-supplement-Figure_S1.pdf]

Figure S2

A

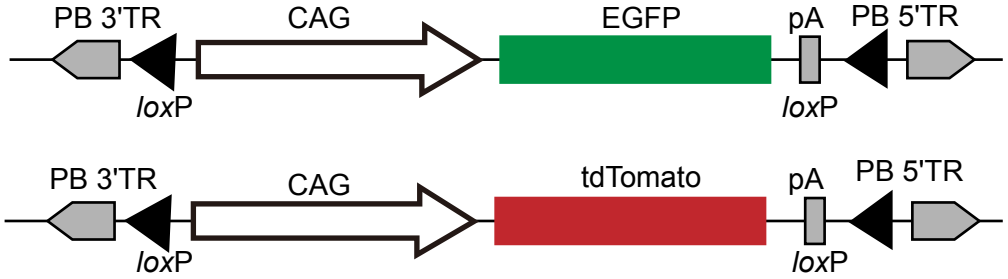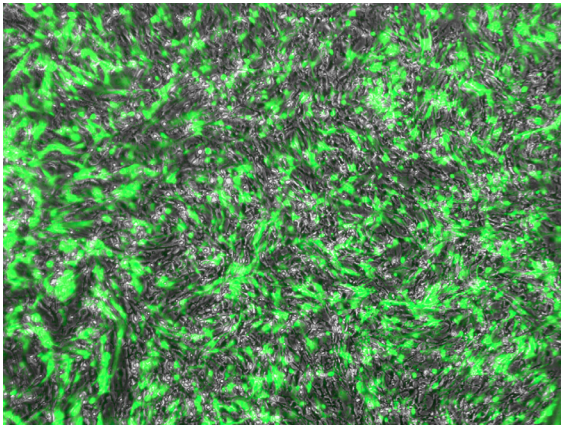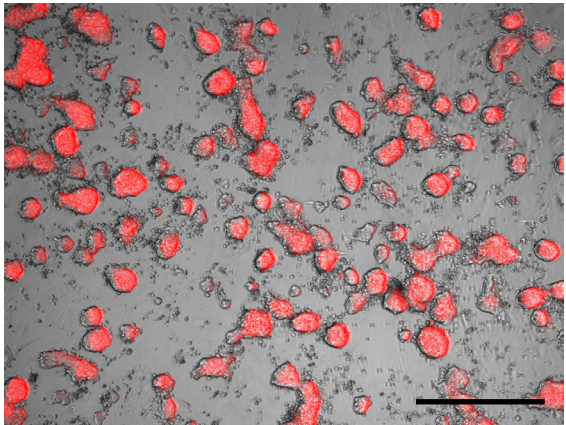

B

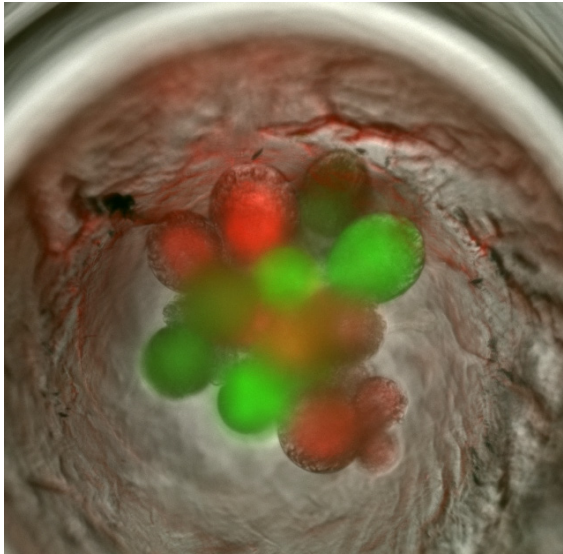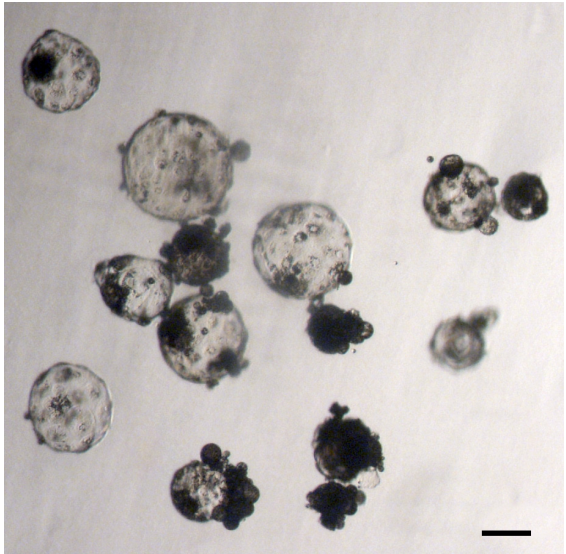

Supplement: NIHMS815618-supplement-Figure_S2.pdf [file NIHMS815618-supplement-Figure_S2.pdf]

Figure S3

A

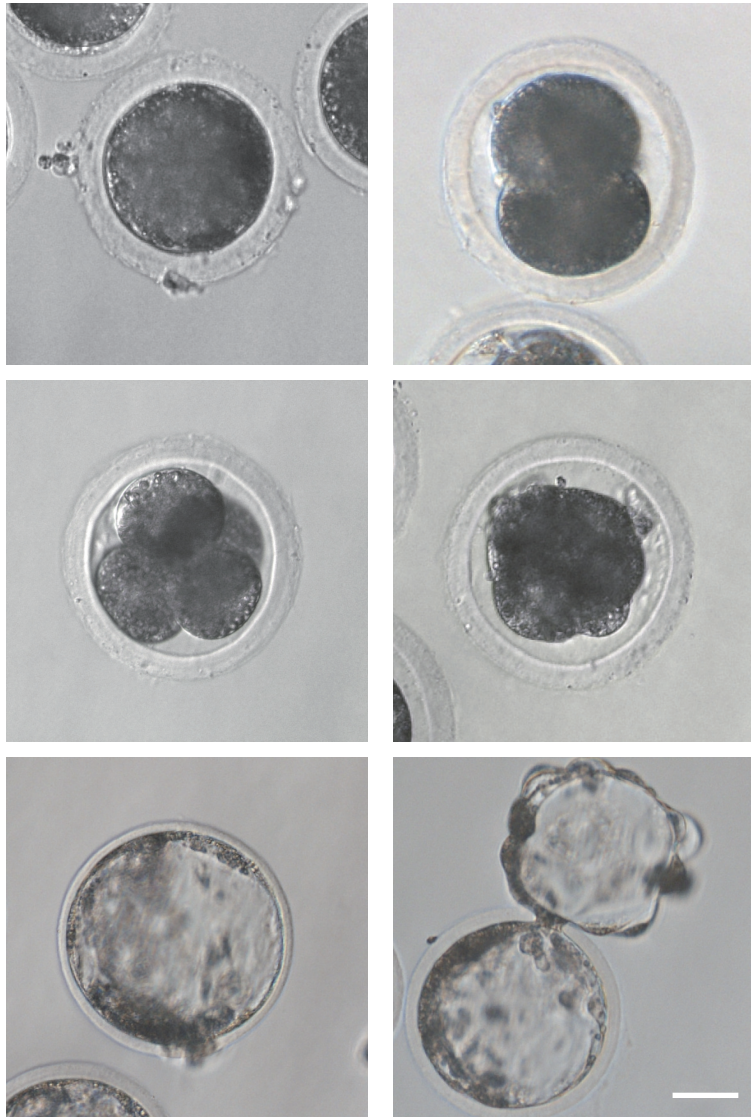

B

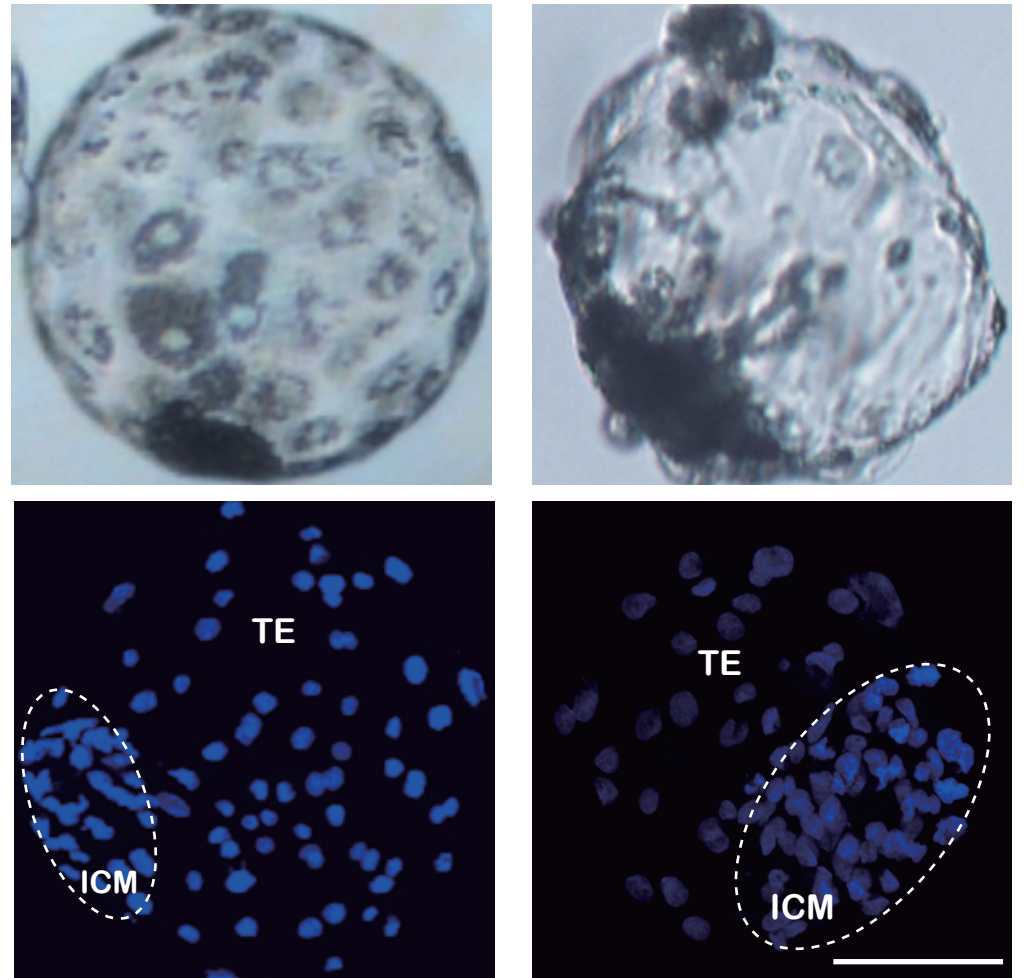

Supplement: NIHMS815618-supplement-Figure_S3.pdf [file NIHMS815618-supplement-Figure_S3.pdf]
